# Supplementary material
Source: PubMed Central journal article supplement (PMC1383634)

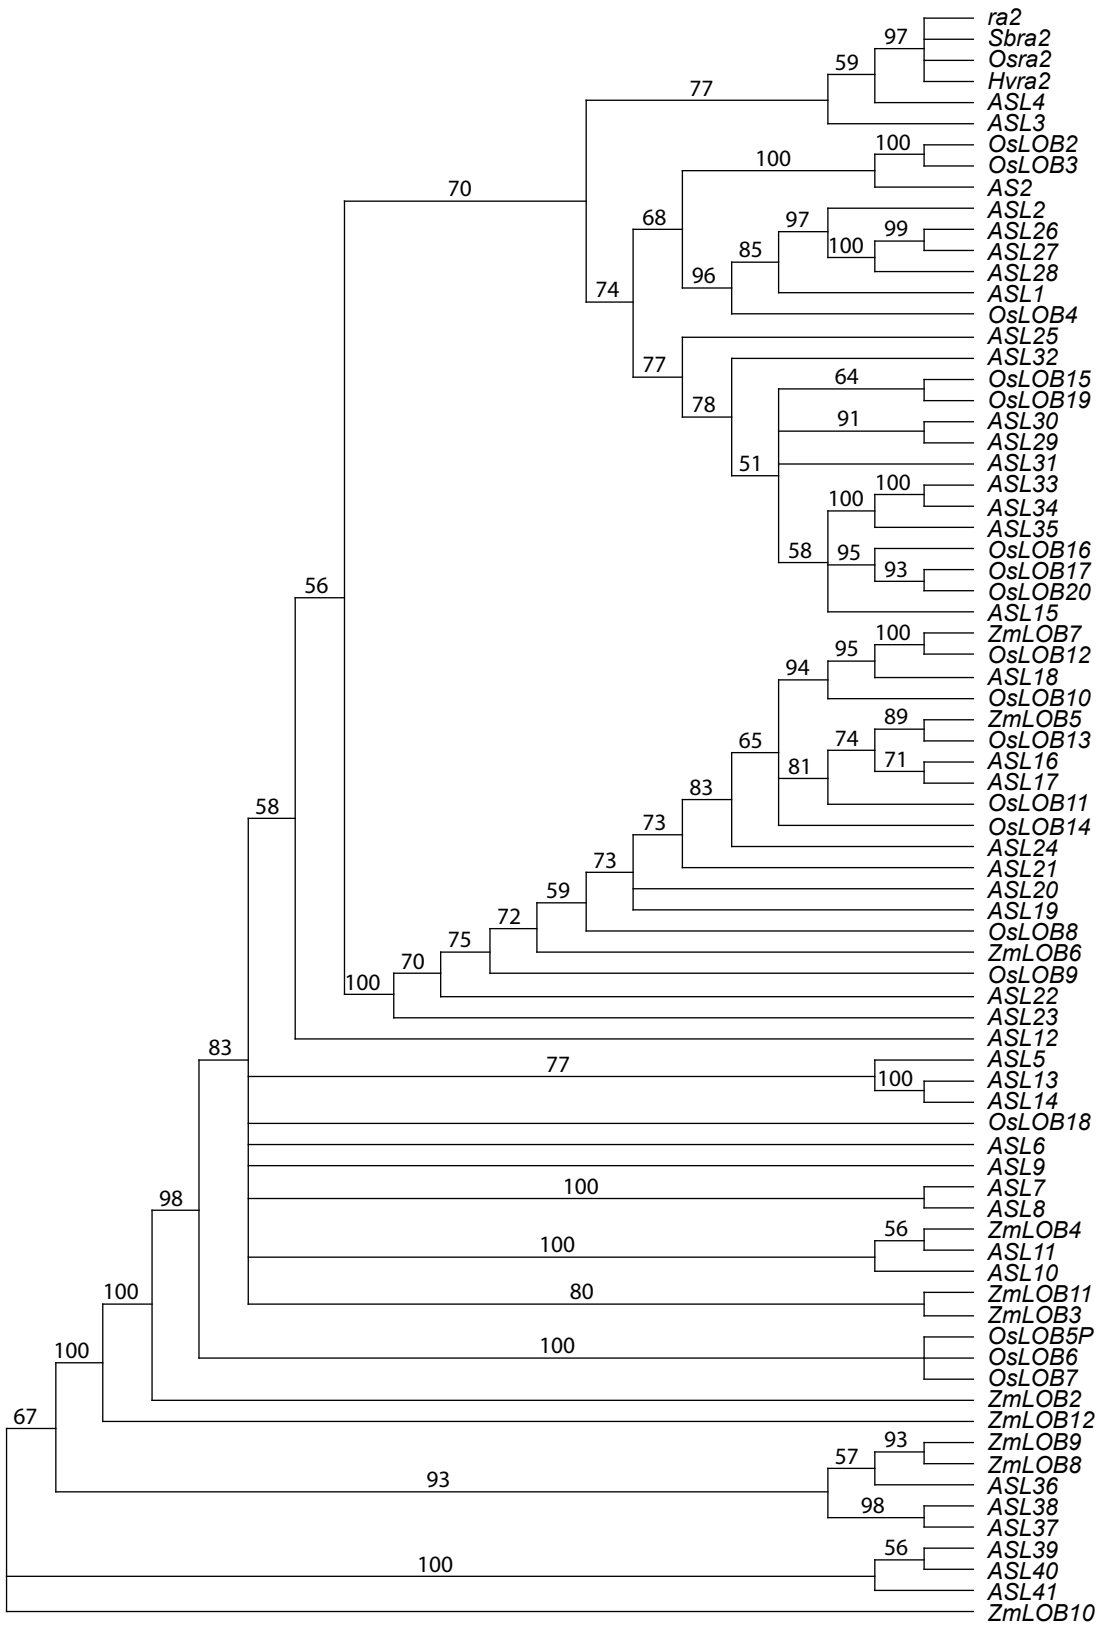

Supplement: plntcell_tpc.105.039032_1.pdf [file plntcell_tpc.105.039032_1.pdf]

**A**

1 2 3 4 5

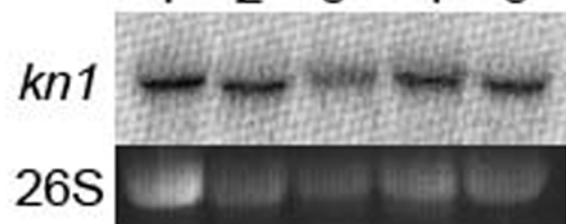**B**

1 2 3 4 5 6

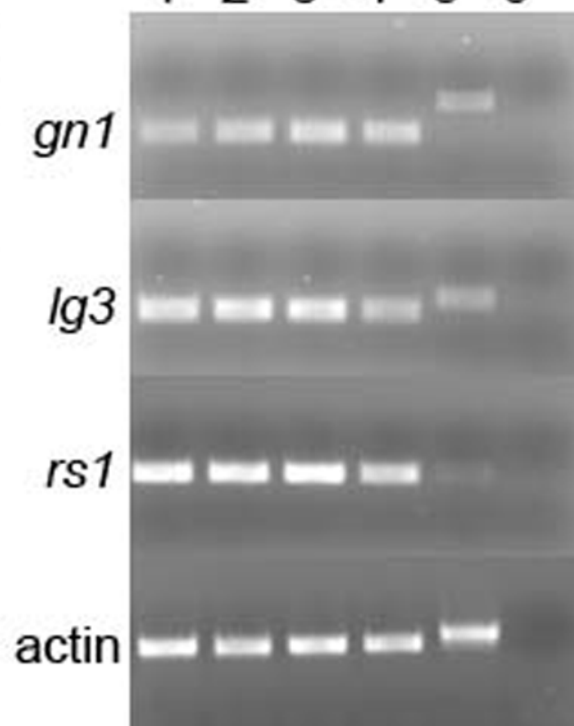

Supplement: plntcell_tpc.105.039032_2.pdf [file plntcell_tpc.105.039032_2.pdf]
